# Supplementary material for: Effects of Dog-Assisted Therapies on Cognitive Mnemonic Capabilities in People Affected by Alzheimer’s Disease
Source: MDPI journal article supplement (doi:10.3390/ani11051366), 2021-05-11
Supplement: s1 [file s1]

*Supplementary Materials*

# Effects of Dog-Assisted Therapies on Cognitive Mnemonic Capabilities in People Affected by Alzheimer's Disease

Fausto Quintavalla <sup>1,\*</sup>, Simona Cao <sup>2</sup>, Diana Spinelli <sup>2</sup>, Paolo Caffarra <sup>3</sup>, Fiammetta M. Rossi <sup>4</sup>, Giuseppina Basini <sup>1</sup> and Alberto Sabbioni <sup>1</sup>

<sup>1</sup> Dipartimento di Scienze Medico Veterinarie, Università di Parma, Via del Taglio 10, 43126 Parma, Italy; giuseppina.basini@unipr.it (G.B.); alberto.sabbioni@unipr.it (A.S.)

<sup>2</sup> Società Cooperativa Sociale r.l. Killia, Via Svetonio 23, 09042 Monserrato, Cagliari, Italy; simona.cao@unipr.it (S.C.); psicologa@killia.it (D.S.)

<sup>3</sup> Sezione di Neuroscienze, Dipartimento di Medicina e Chirurgia, Università di Parma, via Gramsci 14, 43126 Parma, Italy; paolo.caffarra@unipr.it

<sup>4</sup> Associazione Jiva, Via Erberto Carboni, 2/D, 43123 Parma, Italy; piccolafiamma@hotmail.com

\* Correspondence: fausto.quintavalla@unipr.it; fax: +39-0521-032692

**Citation:** Quintavalla, F.; Cao, S.; Spinelli, D.; Caffarra, P.; Rossi, F.M.; Basini, G.; Sabbioni, A. Effects of Dog-Assisted Therapies on Cognitive Mnemonic Capabilities in People Affected by Alzheimer's Disease. *Animals* **2021**, *11*, 1366. <https://doi.org/10.3390/ani11051366>

Academic Editor: Serenella D'Ingeo, Angelo Quaranta and Marcello Siniscalchi

Received: 18 March 2021

Accepted: 4 May 2021

Published: 11 May 2021

**Publisher's Note:** MDPI stays neutral with regard to jurisdictional claims in published maps and institutional affiliations.

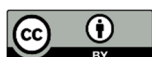

**Copyright:** © 2021 by the authors. Submitted for possible open access publication under the terms and conditions of the Creative Commons Attribution (CC BY) license (<http://creativecommons.org/licenses/by/4.0/>).

| QUESTIONS |                                                                                     |
|-----------|-------------------------------------------------------------------------------------|
| 1         | The dog showed stress signals during the activities.                                |
| 2         | The dog showed calming signals during the activities.                               |
| 3         | The dog is happy while entering in the AAE building/area.                           |
| 4         | The dog looked for human partner's help during critical moments.                    |
| 5         | The dog took distance from human partner during critical moments.                   |
| 6         | The dog got physical injuries during the activities.                                |
| 7         | The dog suffered psychological or emotional traumas during the activities.          |
| 8         | The dog has been interested in the activities.                                      |
| 9         | The dog refused to interact with the patients.                                      |
| 10        | The dog proposed spontaneous interaction with the patients.                         |
| 11        | The dog showed a proactive attitude.                                                |
| 12        | The dog stayed close to the patient and to the human partner during the activities. |
| 13        | The dog showed pleasure in interacting with people during the activity.             |
| 14        | The dog slept longer than usual after the activities.                               |
| 15        | The dog drank more water than usual during the activities.                          |
| 16        | The dog drank more water than usual at the end of the activities.                   |

**Figure S1.** Dog monitoring forms used by AAI operators, with relative scores. The survey was responded to using a 5-point Likert frequency scale, answering “never”, “rarely”, “sometimes”, “frequently”, and “very often”.

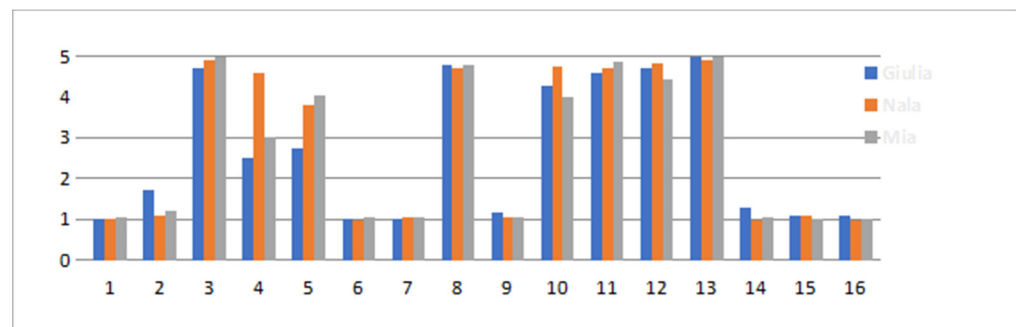

**Figure S2.** Monitoring dogs' welfare. On the vertical axis the dog wellbeing is represented on a 0–5 range score. On the horizontal axis are numbers of questions answered throughout a total of 24 sessions.
